# Supplementary material for: Developing an improved UHPLC method for impurity profile analysis of ceftriaxone using analytical quality by design
Source: Royal Society of Chemistry journal article supplement (doi:10.1039/d2ay02016e), 2022-12-27
Supplement: d2ay02016e1.pdf [file d2ay02016e1.pdf]

1 **Developing an improved UPLC method for impurity profile analysis of**  
2 **ceftriaxone using analytical quality by design**

3

4 Chaoqiang Xiao<sup>a,c,d,#</sup>, Xia Zhang<sup>b,#</sup>, Wei Wang<sup>c</sup>, Xiuyun Yang<sup>c</sup>, Ying Sun<sup>c</sup>, Weifeng  
5 Zhang<sup>d</sup>, Shuwang He<sup>d</sup>, Jie Yang<sup>d</sup>, Zhihua Lv<sup>a,\*</sup>, Changqin Hu<sup>b,\*</sup>

6

7 <sup>a</sup>Key Laboratory of Marine Drugs, Chinese Ministry of Education, School of  
8 Medicine and Pharmacy, Ocean University of China, Qingdao 266003, China

9 <sup>b</sup>Key Laboratory for Quality Research and Evaluation of Chemical Drugs, National  
10 Institutes for Food and Drug Control, Beijing 102629, China

11 <sup>c</sup>Dyne High-tech Pediatric Pharmaceutical R&D Institute, Beijing 100176, China

12 <sup>d</sup>Shandong Dyne Marine Organism Pharmaceutical Co., Ltd, Weihai 264300, China

13

14 **\*Corresponding authors**

15 Zhihua Lv

16 Key Laboratory of Marine Drugs, Chinese Ministry of Education, School of Medicine  
17 and Pharmacy, Ocean University of China, Qingdao 266003, China

18 E-mail: [lvzhihua@ouc.edu.cn](mailto:lvzhihua@ouc.edu.cn)

19

20 Changqin Hu

21 Key Laboratory for Quality Research and Evaluation of Chemical Drugs, National  
22 Institutes for Food and Drug Control, Beijing 102629, China.

23 E-mail: [hucq@nifdc.org.cn](mailto:hucq@nifdc.org.cn)

24

25 # ChaoQiang Xiao and Xia Zhang contributed equally.

26 **Tables**27 **Table S1.** Columns used in the study

| Brand    | Type                 | Packing | Specifications       | L/dp  |
|----------|----------------------|---------|----------------------|-------|
| Waters   | Cortecs,             | C18     | 100 × 2.1 mm, 1.6 μm | 62500 |
|          | Acquity UPLC BEH,    | C18     | 50 × 2.1 mm, 1.7 μm  | 29412 |
|          | Acquity UPLC HSS ,   | C18     | 100 × 2.1 mm, 1.8 μm | 55556 |
| Thermo   | HYPERSIL GOLD        | C18     | 100 × 2.1 mm, 1.9 μm | 52632 |
|          | HYPERSIL GOLD AQ     | C18     | 100 × 2.1 mm, 1.9 μm | 52632 |
| Shiseido | Capcell Pak C18 MGII | C18     | 250 × 4.6 mm, 5 μm   | 50000 |

28

29

30 **Table S2.** Screening test operation table and response results

| Exp No | A [mol/l] | B   | C [°C] | D [ml/min] | E [%] | Rs1  | Rs2  | Rs3  |
|--------|-----------|-----|--------|------------|-------|------|------|------|
| 1      | 0.01      | 5.0 | 25.0   | 0.384      | 32    | 1.96 | 1.73 | 0.00 |
| 2      | 0.05      | 5.0 | 25.0   | 0.384      | 22    | 13.3 | 4.40 | 1.50 |
| 3      | 0.01      | 8.0 | 25.0   | 0.384      | 22    | 3.30 | 0.00 | 0.00 |
| 4      | 0.05      | 8.0 | 25.0   | 0.384      | 32    | 3.00 | 2.50 | 1.20 |
| 5      | 0.01      | 5.0 | 40.0   | 0.384      | 22    | 11.6 | 1.30 | 0.00 |
| 6      | 0.05      | 5.0 | 40.0   | 0.384      | 32    | 5.80 | 1.50 | 0.00 |
| 7      | 0.01      | 8.0 | 40.0   | 0.384      | 32    | 0.00 | 0.00 | 0.00 |
| 8      | 0.05      | 8.0 | 40.0   | 0.384      | 22    | 5.10 | 4.20 | 2.70 |
| 9      | 0.01      | 5.0 | 25.0   | 0.713      | 22    | 9.60 | 0.00 | 0.00 |
| 10     | 0.05      | 5.0 | 25.0   | 0.713      | 32    | 4.60 | 1.80 | 0.00 |
| 11     | 0.01      | 8.0 | 25.0   | 0.713      | 32    | 0.00 | 0.00 | 0.00 |
| 12     | 0.05      | 8.0 | 25.0   | 0.713      | 22    | 3.60 | 7.40 | 2.50 |
| 13     | 0.01      | 5.0 | 40.0   | 0.713      | 32    | 3.17 | 1.02 | 0.00 |
| 14     | 0.05      | 5.0 | 40.0   | 0.713      | 22    | 2.90 | 13.5 | 1.60 |
| 15     | 0.01      | 8.0 | 40.0   | 0.713      | 22    | 4.50 | 0.00 | 0.00 |
| 16     | 0.05      | 8.0 | 40.0   | 0.713      | 32    | 2.00 | 2.20 | 1.20 |
| 17     | 0.03      | 6.5 | 32.5   | 0.548      | 27    | 4.30 | 0.00 | 0.00 |
| 18     | 0.03      | 6.5 | 32.5   | 0.548      | 27    | 4.30 | 0.00 | 0.00 |
| 19     | 0.03      | 6.5 | 32.5   | 0.548      | 27    | 4.30 | 0.00 | 0.00 |

31

32

---

33

34 **Table S3.** Optimization test operation table and response results

---

| Exp No | A    | B   | E [%] | Rs1  | Rs2  | Rs3  |
|--------|------|-----|-------|------|------|------|
| 1      | 0.01 | 5.0 | 25.0  | 6.80 | 1.00 | 0.00 |
| 2      | 0.05 | 5.0 | 25.0  | 11.5 | 3.20 | 1.50 |
| 3      | 0.01 | 8.0 | 25.0  | 3.00 | 0.00 | 0.10 |
| 4      | 0.05 | 8.0 | 25.0  | 7.00 | 8.40 | 2.70 |
| 5      | 0.01 | 5.0 | 32.0  | 2.80 | 0.00 | 0.00 |
| 6      | 0.05 | 5.0 | 32.0  | 7.30 | 2.70 | 0.60 |
| 7      | 0.01 | 8.0 | 32.0  | 1.30 | 0.00 | 0.00 |
| 8      | 0.05 | 8.0 | 32.0  | 3.40 | 2.30 | 1.40 |
| 9      | 0.01 | 6.5 | 28.5  | 3.80 | 0.00 | 0.00 |
| 10     | 0.05 | 6.5 | 28.5  | 7.80 | 1.50 | 1.70 |
| 11     | 0.03 | 5.0 | 28.5  | 6.20 | 1.70 | 0.00 |
| 12     | 0.03 | 8.0 | 28.5  | 3.80 | 2.00 | 1.30 |
| 13     | 0.03 | 6.5 | 25.0  | 8.20 | 0.00 | 1.60 |
| 14     | 0.03 | 6.5 | 32.0  | 4.00 | 0.00 | 0.20 |
| 15     | 0.03 | 6.5 | 28.5  | 6.00 | 0.00 | 1.40 |
| 16     | 0.03 | 6.5 | 28.5  | 6.80 | 0.00 | 1.50 |
| 17     | 0.03 | 6.5 | 28.5  | 5.80 | 0.00 | 1.40 |

---

35

36 **Table S4.** model parameters of RS1, RS2, and RS3 response in the optimization test

| Rs1       | Coeff. SC | Std. Err. | P            | Conf. int (±) |
|-----------|-----------|-----------|--------------|---------------|
| Constant  | 6.06      | 0.24      | 9.41E-12     | 0.52          |
| A [mol/L] | 1.93      | 0.20      | 5.66E-07     | 0.44          |
| B         | -1.61     | 0.20      | 3.79E-06     | 0.44          |
| E [%]     | -1.77     | 0.20      | 1.42E-06     | 0.44          |
| B*B       | -0.75     | 0.31      | 3.47E-02     | 0.68          |
| N = 17    | Q2 =      | 0.89      | Cond. no. =  | 2.88          |
| DF = 12   | R2 =      | 0.95      | RSD =        | 0.64          |
|           | R2 adj. = | 0.94      |              |               |
|           |           |           | Confidence = | 0.95          |

| Rs2~      | Coeff. SC | Std. Err. | P            | Conf. int (±) |
|-----------|-----------|-----------|--------------|---------------|
| Constant  | 0.45      | 0.07      | 1.31E-04     | 0.16          |
| A [mol/l] | 0.42      | 0.06      | 2.34E-05     | 0.13          |
| B         | -0.02     | 0.06      | 0.77         | 0.13          |
| E [%]     | -0.11     | 0.06      | 7.40E-02     | 0.13          |
| B*B       | 0.60      | 0.10      | 1.72E-04     | 0.23          |
| E*E       | -0.16     | 0.10      | 0.15         | 0.23          |
| A*B       | 0.11      | 0.06      | 0.12         | 0.14          |
| N = 17    | Q2 =      | 0.71      | Cond. no. =  | 3.98          |
| DF = 10   | R2 =      | 0.91      | RSD =        | 0.18          |
|           | R2 adj. = | 0.85      |              |               |
|           |           |           | Confidence = | 0.95          |

| Rs3~      | Coeff. SC | Std. Err. | P        | Conf. int (±) |
|-----------|-----------|-----------|----------|---------------|
| Constant  | 1.32      | 0.002692  | 2.97E-23 | 6.00E-03      |
| A [mol/l] | 0.016     | 0.002253  | 2.97E-05 | 5.02E-03      |
| B         | 0.0070    | 0.002253  | 1.14E-02 | 5.02E-03      |
| E [%]     | -0.0076   | 0.002253  | 7.37E-03 | 5.02E-03      |
| B*B       | -0.0075   | 0.003511  | 5.78E-02 | 7.82E-03      |

|         |           |          |              |          |
|---------|-----------|----------|--------------|----------|
| A*B     | 0.0047    | 0.002519 | 8.89E-02     | 5.61E-03 |
| A*E     | -0.0052   | 0.002519 | 6.36E-02     | 5.61E-03 |
| N = 17  | Q2 =      | 0.75     | Cond. no. =  | 2.88     |
| DF = 10 | R2 =      | 0.90     | RSD =        | 0.0071   |
|         | R2 adj. = | 0.83     |              |          |
|         |           |          | Confidence = | 0.95     |

37 **Table S5.** Optimization criteria for Rs1, Rs2, and Rs3

| Response | Criterion | Min  | Target | Pred. min | Pred. max |
|----------|-----------|------|--------|-----------|-----------|
| Rs1      | Maximize  | 1.20 | 4.00   | -4.07E-06 | 10.62     |
| Rs2      | Maximize  | 1.20 | 3.00   | -0.28     | 6.95      |
| Rs3      | Maximize  | 1.20 | 2.00   | -0.22     | 2.80      |

38

39

40 **Table S6.** Column parameters of chromatographic column

| F    | Column                        | H     | S      | A      | B      | C      | C      | Manufacturer    |
|------|-------------------------------|-------|--------|--------|--------|--------|--------|-----------------|
| 0    | Hypersil GOLD                 | 0.881 | 0.002  | -0.017 | 0.036  | 0.162  | 0.479  | Thermo/Hypersil |
| 1.5  | Acquity UPLC BEH Shield RP-18 | 0.907 | 0.016  | -0.031 | 0.133  | -0.055 | 0.416  | Waters          |
| 1.92 | Hypersil GOLD aQ              | 0.915 | -0.010 | -0.065 | -0.019 | 0.371  | 0.638  | Thermo/Hypersil |
| 2.67 | Capcell Pak C18 MGII          | 1.011 | 0.011  | 0.047  | -0.006 | 0.007  | -0.009 | Shiseido        |
| 5.28 | HSS T3                        | 0.949 | -0.021 | -0.173 | -0.002 | 0.031  | 0.180  | Waters          |
| 5.49 | Cortecs C18                   | 1.075 | 0.043  | -0.108 | -0.037 | 0.063  | 0.035  | Waters          |

41

42

43

44

45 **Figures**

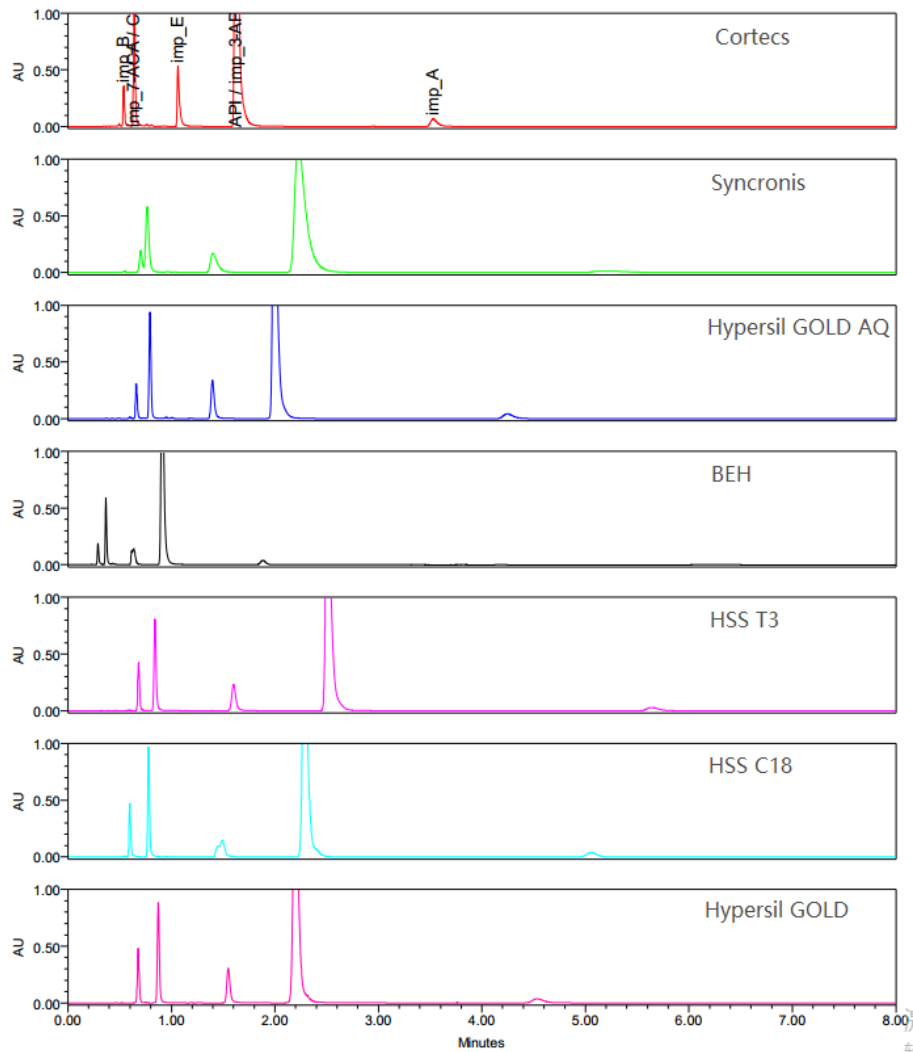

46

47 Fig. S1. Chromatogram of sample solution under different column conditions. The  
 48 co-elution of 7-ACA and C is presented in the upper left second peak; the co-elution  
 49 of API and 3-API is presented in the main peak.

50

51

52

53

54

55

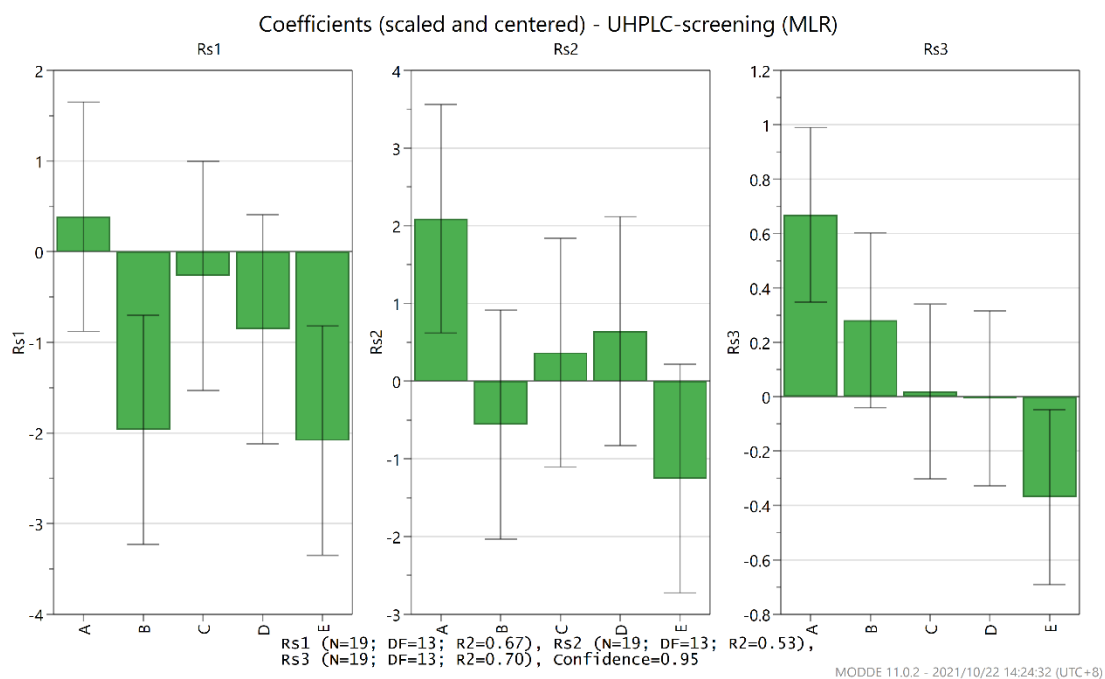

56

57 **Fig. S2.** Coefficient plot for models created using screening design including  
 58 coefficients and confidence interval. The effects of the five studied factors the  
 59 concentration of octylamine (A, 0.01-0.05mM), pH value of mobile phase (B, 5-8),  
 60 column temperature (C, 25-40°C), flow rate (D, 0.384-0.713mL / min), and organic  
 61 phase ratio (E, 22-32%).and results of their significance tests for resolution between  
 62 impurities B and 7-ACA (RS1), resolution between impurities 7-ACA and C (RS2), and  
 63 resolution between impurities 3-API and ceftriaxone.

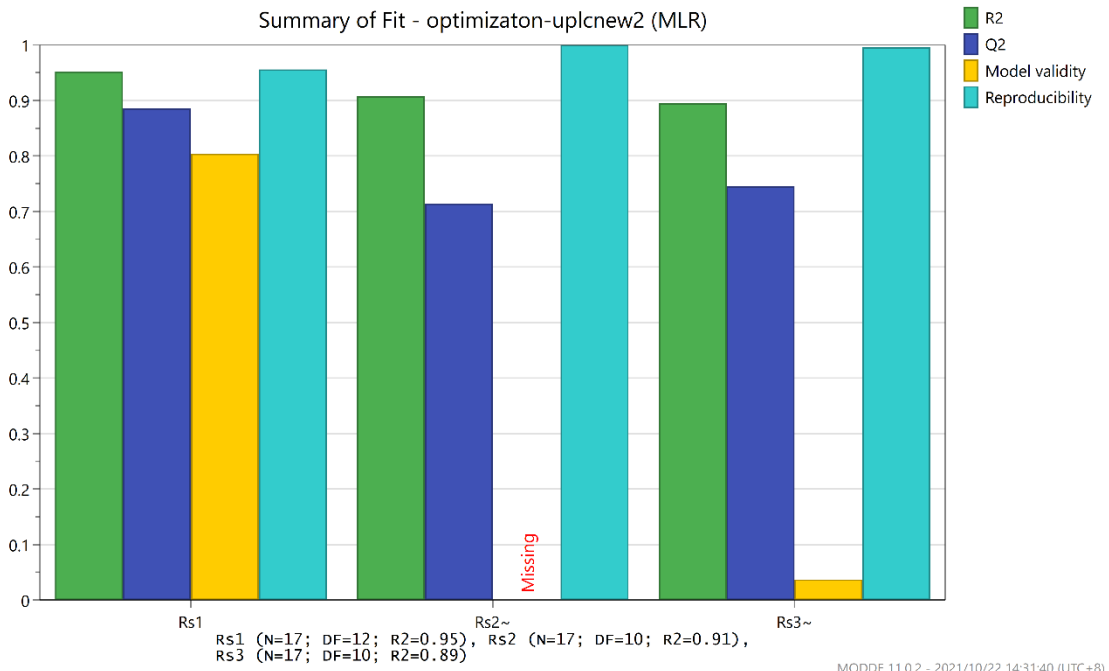

64

65 Fig. S3. Comparison diagram of model parameters of response results of  
 66 optimization test (model validity for Rs2 is missing, because of the extremely good  
 67 replicates).



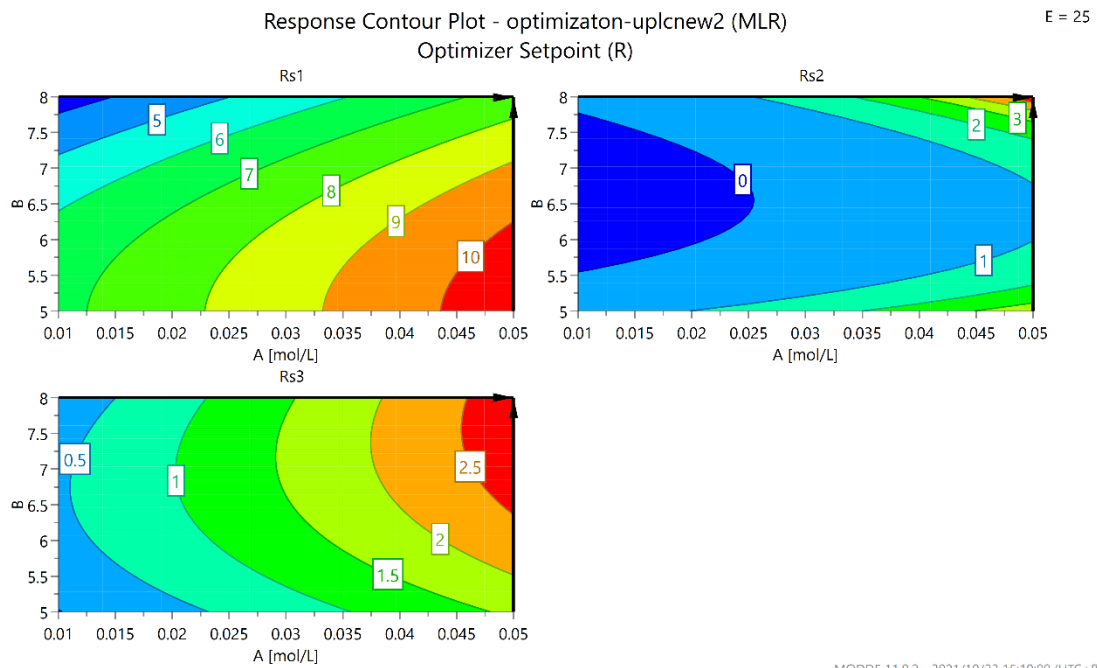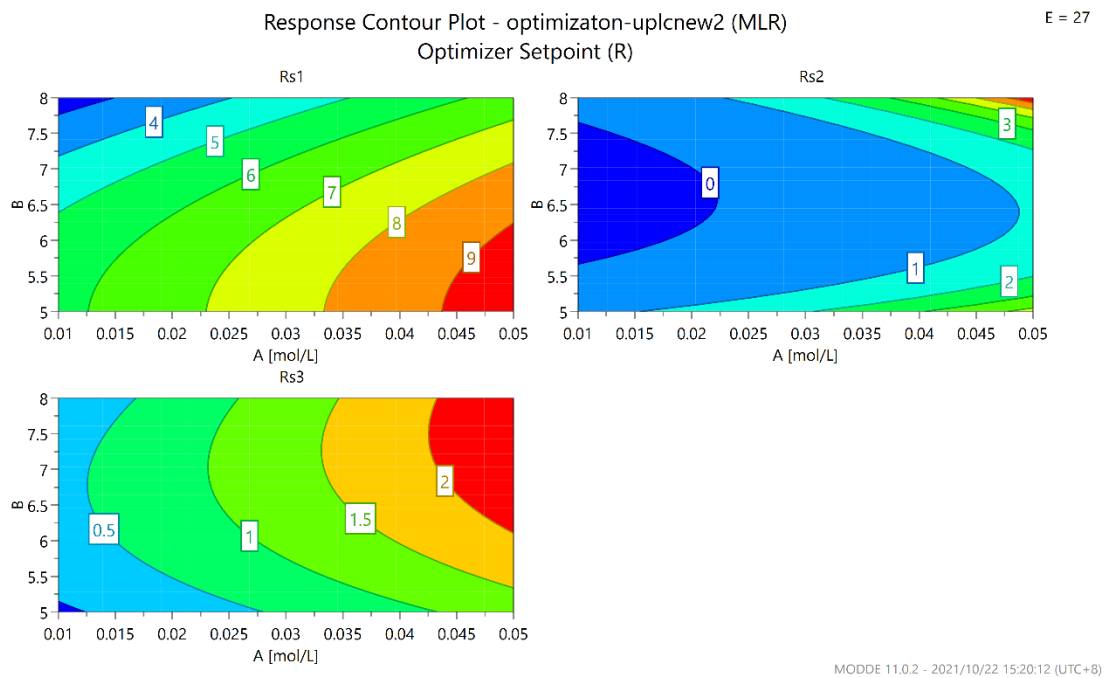

71 Fig. S4. Isoresponse surfaces drawn for Rs1, Rs2, and Rs3 by plotting A vs. B at E  
72 = 25% and 27%.

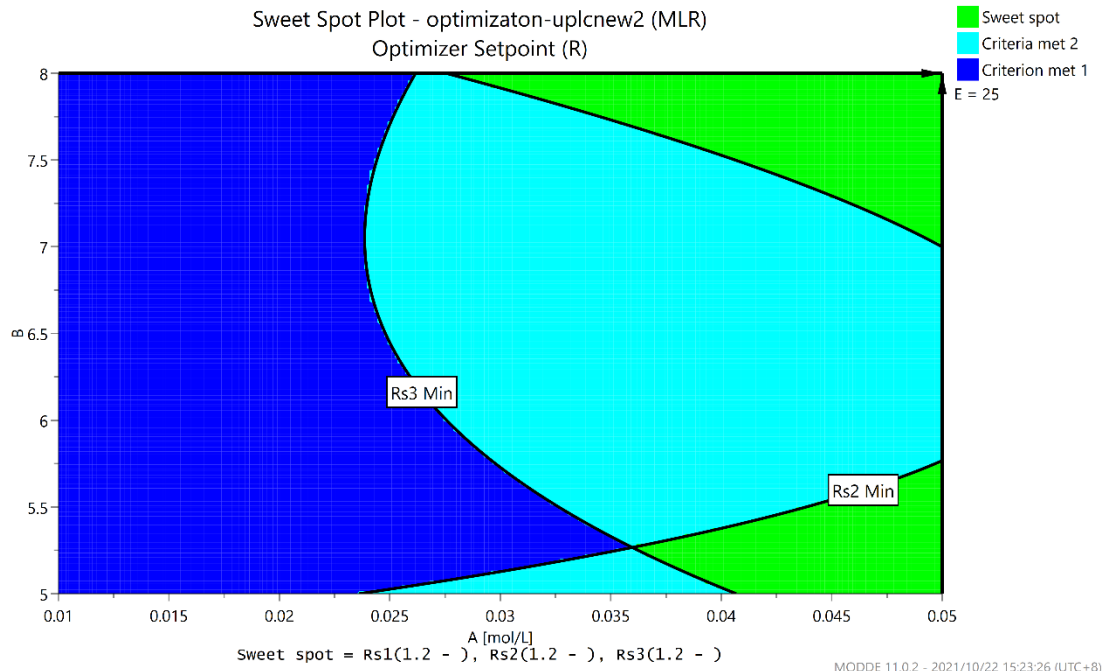

73

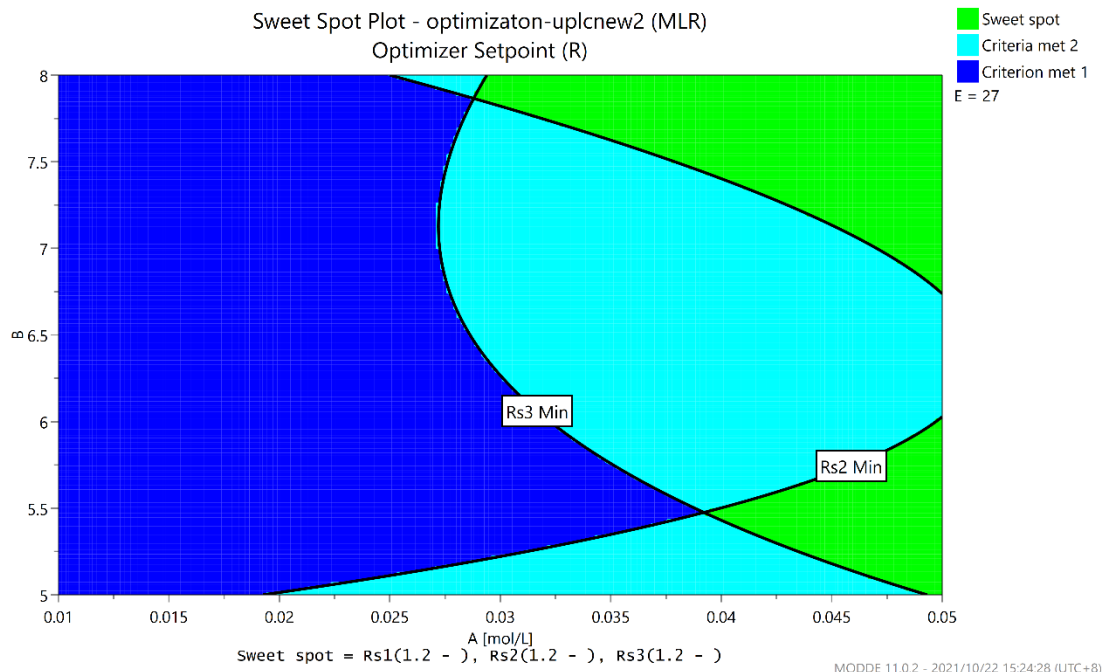

74

75 Fig. S5. Sweet spot plots obtained by plotting A vs. B at (a) E = 25%; (b) E = 27%.

76 Green: all the requirements for the CMAs are fulfilled; pale blue: two requirements

77 fulfilled; dark blue: only one requirement fulfilled.

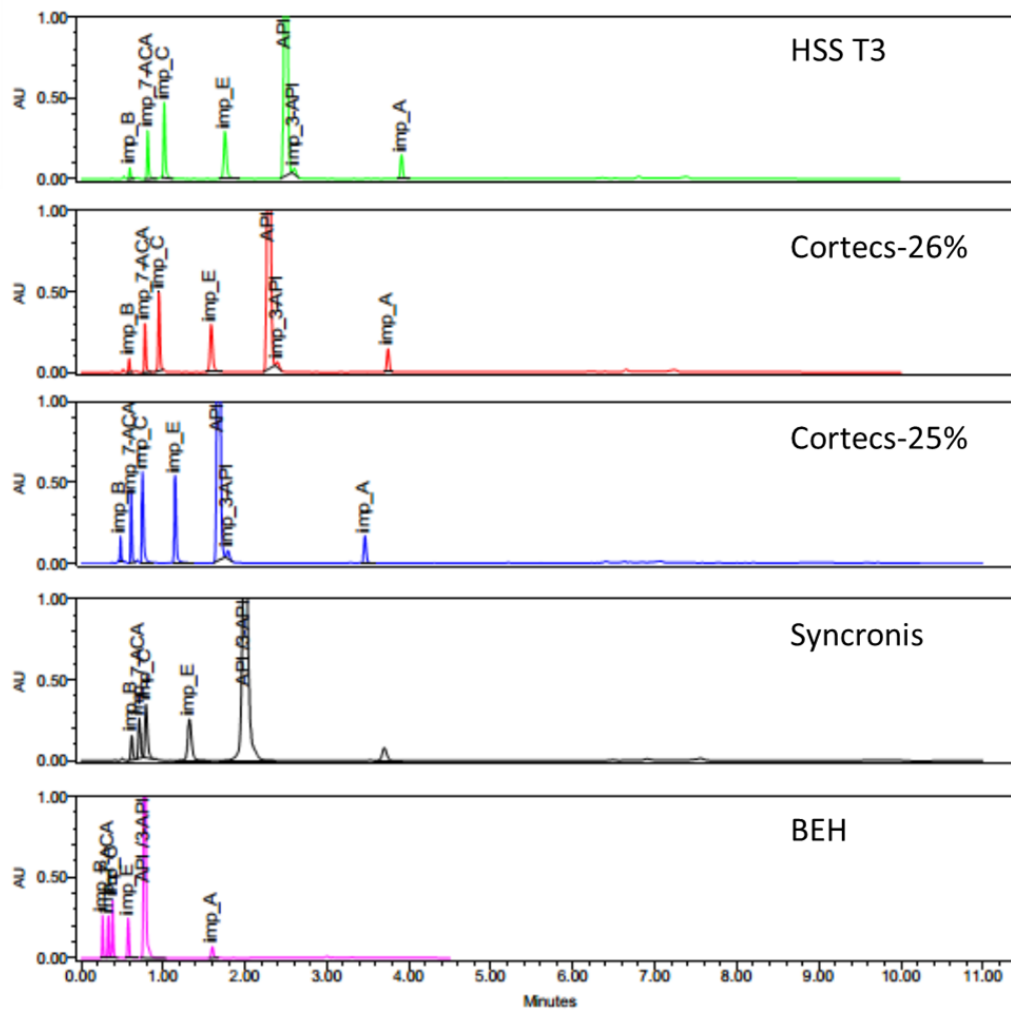

78

79 **Fig. S6.** Typical chromatogram with different columns. Impurities B, 7-ACA, and C  
 80 can be completely separated, however the resolution between impurity 3-API and  
 81 ceftriaxone was affected by the chromatographic column. RS3 was 1.5 under the  
 82 condition of 26% acetonitrile with Cortecs columns. After reducing the proportion of  
 83 acetonitrile to 25%, RS3 increased to 1.8.
